# Supplementary material
Source: publisher figshare collection journal article supplement (https://aacr.figshare.com/articles/dataset/_/22441471)
Supplement: Supplementary file 1 [file 39892348]

### **Supplementary Figure 1.**

**A.** Transcriptome correlation map of 20q region of interest in 43 breast samples (7 type 1 and 36 non-amplified). The transcription correlation score (TCS) evaluates the correlation between the expression profile of each gene and those of its neighbors. The diagram showed the TCS for each gene: each point represents a gene and the orange-colored line represents the significant threshold (equal to 0.45) for the TCS. Genes with a score exceeding the threshold are significantly correlated with their neighbors. **B.** Transcriptome correlation map of 20q region of interest in 48 breast samples (12 type 2 and 36 non-amplified). Legend similar to A (significant threshold for TCS equal to 0.44).
